# Supplementary material for: First-principles calculations on the resistance and electronic properties of H2 adsorption on a CoO–SnO2 heterojunction surface
Source: Royal Society of Chemistry journal article supplement (doi:10.1039/d1cp04539c), 2021-11-24
Supplement: d1cp04539c1.pdf [file d1cp04539c1.pdf]

Supporting Information

**First-Principles Calculations on Resistance and Electronic  
Properties of H<sub>2</sub> Adsorption on CoO-SnO<sub>2</sub> Heterojunction  
Surface**

Yunxia He<sup>a</sup>, Jing Li<sup>a\*</sup>, Lin Tao<sup>b\*</sup>, Shuai Nie<sup>a</sup>, Timing Fang<sup>c</sup>, Xitao Yin<sup>d</sup> and Qi

Wang<sup>a</sup>

<sup>a</sup>School of Materials and Metallurgy, University of Science and Technology Liaoning,  
Anshan 114051, Liaoning, China

<sup>b</sup>School of Chemical Engineering, University of Science and Technology Liaoning,  
Anshan 114051, Liaoning, China

<sup>c</sup>School of Chemistry and Chemical Engineering, Qingdao University, Qingdao,  
Shandong, 266071, China

<sup>d</sup>School of Physics and Optoelectronic Engineering, Ludong University, Yantai  
264000, Shandong, China

**\*Corresponding author:**

**Jing Li,**

E-mail: lijing\_as321@163.com

**Lin Tao**

E-mail: taolin\_phd@163.com

The n-type and p-type semiconductor materials have the different charge carrier, therefore, the space charge models of n-type semiconductor materials and p-type semiconductor materials need to be discussed respectively. The electrons will transfer from the surface of the semiconductor material to oxygen when the metal oxide semiconductor material be exposed in air. Oxygen will capture the electrons and form negative oxygen anion.

Because the concentration of electrons in n-type semiconductor materials is larger than the concentration of holes, n-type semiconductor materials are electrically conductive. When n-type materials are exposed to the air, the oxygen in the air will capture the electrons on the surface of n-type semiconductor materials to form adsorbed oxygen anion. And the electrons on the surface of n-type semiconductor materials are decrease.

When the n-type metal oxide semiconductor materials are in the reducing gases such as  $H_2$ , the reducing gases will provide electrons to the n-type metal oxide semiconductor materials. It will increase the electrons in the n-type metal oxide semiconductor materials, and decrease the resistance, changing the conductivity to  $H_2$ .

The concentration of electrons in p-type semiconductors is far less than that of holes, so p-type semiconductors conduct holes and holes are charge carriers. When p-type materials are exposed in the air, the oxygen in the air acquires the electrons on the p-type semiconductor materials surface and forms oxygen negative ions. Meanwhile, the electrons on the surface of p-type semiconductor materials decrease and the holes

concentration increases. When p-type metal oxide semiconductor materials are in reducing gases such as H<sub>2</sub>, the reducing gases will provide electrons to p-type metal oxide semiconductor materials. It will increase the electrons and decrease the holes concentration in p-type metal oxide semiconductor materials. As a result, the decreases about the carrier concentration, the conductivity, and the resistance increases, changing the conductivity to H<sub>2</sub>. Because the adsorption of oxygen will affect the adsorption about target gas on the surface of gas carrier, we need to find out the optimal adsorption point of oxygen on the surface of gas carrier. The smaller E<sub>ads</sub> of gas on the heterojunction surface, indicated the gas adsorption is more stable and difficult to be dissociated. The calculation result as follow:

**Table S1** The adsorption of O<sub>2</sub> on SnO<sub>2</sub>(110)/CoO(100) heterojunction

| Sites              | E <sub>ads</sub> (eV) | Distance (Å) |
|--------------------|-----------------------|--------------|
| O1 vertical        | -3.6871               | 2.8082       |
| O2 vertical        | -3.6624               | 2.5540       |
| Co1 vertical       | -3.6624               | 1.7095       |
| Co2 vertical       | -3.5170               | 3.0794       |
| Parallel surface 1 | -4.4046               | 1.8242       |
| Parallel surface 2 | -4.3139               | 1.8363       |

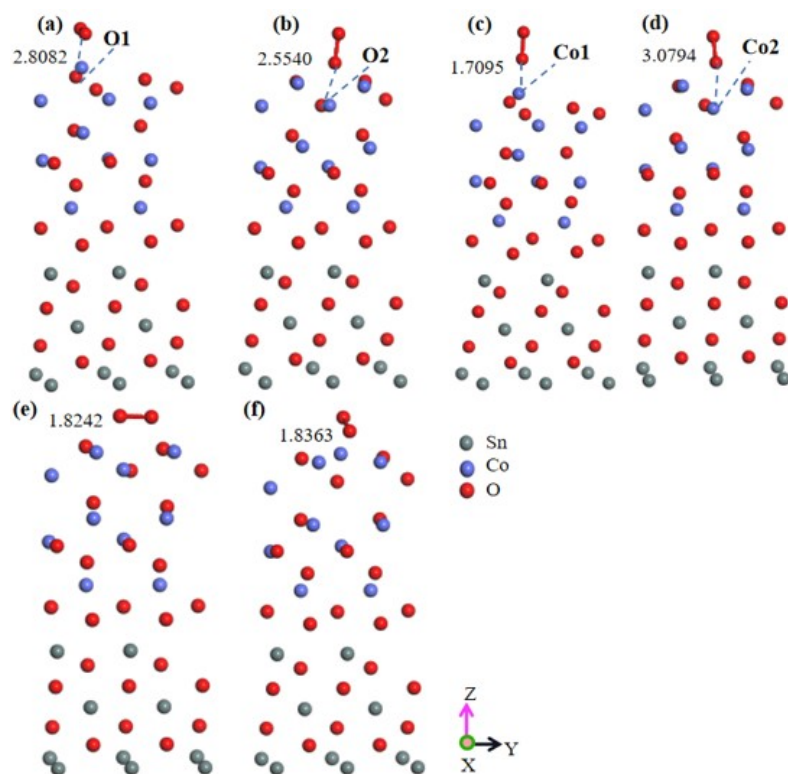

**Figure S1** Optimized structure that  $O_2$  is adsorbed on  $SnO_2(110)/CoO(100)$  heterojunction surface.

(a-d) Vertical the surface; (e, f) Parallel surface 1, and Parallel surface 2.

There are vertical and parallel modalities when  $O_2$  is adsorbed on different sites of  $SnO_2(110)/CoO(100)$  heterojunction surface (including four vertical formation O1, O2, Co1, Co2 sites and parallel formation Parallel surface 1, Parallel surface 2) as shown in Figure S1. In Table S1, the  $E_{ads}$  is negative when  $O_2$  is adsorbed on different sites of the heterojunction surface. It means the adsorption of  $O_2$  on the heterojunction is spontaneous. The adsorbed distance of  $O_2$  on different sites is less than 3 Å, except on Co2 site. It indicates the formation of bonding between  $O_2$  molecule and adsorbed sites. According to the  $E_{ads}$  and adsorbed distance, Parallel surface 1 is the best form of  $O_2$  on the heterojunction surface.

**Table S2** The adsorption of O<sub>2</sub> on CoO(110)/SnO<sub>2</sub>(100) heterojunction

| Sites              | E <sub>ads</sub> (eV) | Distance (Å) |
|--------------------|-----------------------|--------------|
| O1 vertical        | -4.8895               | 2.7525       |
| O2 vertical        | -5.1878               | 3.0425       |
| Sn vertical        | -5.1056               | 2.7120       |
| Parallel surface 1 | -5.4001               | 2.4031       |
| Parallel surface 2 | -5.3621               | 2.4179       |

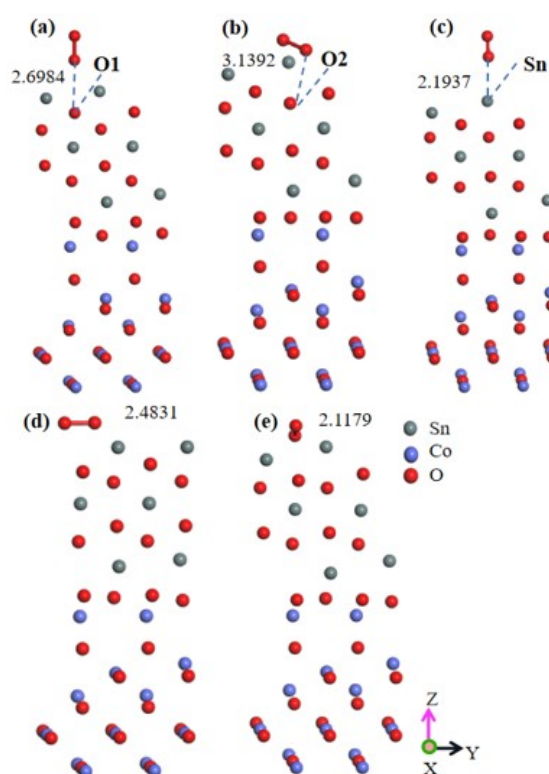

**Figure S2** Optimized structure that O<sub>2</sub> is adsorbed on CoO(110)/SnO<sub>2</sub>(100) heterojunction surface.

(a-c) Vertical the surface; (d, e) Parallel surface 1 and Parallel surface 2.

Figure S2 shows vertical and parallel modalities when O<sub>2</sub> is adsorbed on different sites of the CoO(110)/SnO<sub>2</sub>(100) heterojunction surface (including three vertical formations O1, O2, Sn sites and two parallel formations Parallel surface 1, Parallel surface 2). The E<sub>ads</sub> is negative when O<sub>2</sub> is adsorbed on different sites of the

heterojunction surface, as shown in Table S2. It indicates the adsorption of O<sub>2</sub> molecule on the heterojunction surface is an exothermic reaction and O<sub>2</sub> can be stably adsorbed on the heterojunction surface. All adsorbed distance are less than 3 Å when O<sub>2</sub> is adsorbed on different sites of the heterojunction surface, except on O<sub>2</sub> molecule, O2 sites. In the case of Parallel surface 1 owes the smaller E<sub>ads</sub> and less adsorbed distance of O<sub>2</sub> on the heterojunction surface. Consequently, Parallel surface 1 is the best adsorption form of O<sub>2</sub> on the heterojunction surface.

**Table S3** H<sub>2</sub> is adsorbed on CoO(110)(II)

| Site           | E <sub>ads</sub> (eV) | Distance (Å) |
|----------------|-----------------------|--------------|
| O <sub>2</sub> | 0.8061                | 2.5183       |
| O1             | 0.4413                | 3.3777       |
| O2             | -2.3144               | 3.8017       |
| Co1            | -0.4980               | 2.5752       |
| Co2            | -0.0618               | 4.3027       |

**Table S4** H<sub>2</sub> is adsorbed on SnO<sub>2</sub>(100)(II)

| Atom           | E <sub>ads</sub> (eV) | Distance (Å) |
|----------------|-----------------------|--------------|
| O <sub>2</sub> | -0.2475               | 2.2459       |
| Sn             | -0.2884               | 2.8692       |
| O1             | 2.3778                | 3.5501       |
| O2             | -1.0945               | 2.6711       |

Table S3 shows the E<sub>ads</sub> and the adsorbed distance when H<sub>2</sub> is adsorbed on different sites (including O site of O<sub>2</sub> molecule, and O1, O2, Co1 and Co2 sites) of CoO(110) surface. The E<sub>ads</sub> and adsorbed distance have obvious variations. The adsorption energy is positive when H<sub>2</sub> is adsorbed on O site of O<sub>2</sub> molecule, O2 site, and negative when H<sub>2</sub> is adsorbed on O2 site, Co1 site and Co2 site. It evidently indicates that the adsorption of H<sub>2</sub> on O2 site, Co1 site and Co2 site are exothermic. In addition,

the adsorbed distance is less than 3 Å when H<sub>2</sub> is adsorbed on O<sub>2</sub> molecule and Co1 site. Thus, according to the E<sub>ads</sub> and adsorbed distance, H<sub>2</sub> tends to be adsorbed on Co1 more easily.

Table S4 reveals the adsorption energy and the adsorbed distance when H<sub>2</sub> is adsorbed on different sites of SnO<sub>2</sub>(100) surface, including O site of O<sub>2</sub> molecule, O1 site, O2 site, and Sn (where the surface Sn atoms are equivalent for passing through the supercell) site. The E<sub>ads</sub> is positive when H<sub>2</sub> is adsorbed on O1 site of SnO<sub>2</sub>(100) surface. And the E<sub>ads</sub> are negative when H<sub>2</sub> is adsorbed on O site of O<sub>2</sub> molecule, O1 site, and O2 site. Moreover, the adsorbed distance are less than 3 Å when H<sub>2</sub> is adsorbed on O site of O<sub>2</sub> molecule, O1 site, and O2 site. Therefore, H<sub>2</sub> not only readily adsorbs to the O2 site of SnO<sub>2</sub>(100) surface and O sites of O<sub>2</sub> molecules, but also forms chemical bonds with O2 site and O<sub>2</sub> molecule.

Overall, Table S3 and S4 demonstrate that H<sub>2</sub> readily adsorbs on the SnO<sub>2</sub> surface.

**Table S5** The adsorption of O<sub>2</sub> on CoO(110) surface

| Sites              | E <sub>ads</sub> (eV) | Distance (Å) |
|--------------------|-----------------------|--------------|
| O1 vertical        | -6.3345               | 3.2390       |
| O2 vertical        | -2.4048               | 2.5659       |
| Co1 vertical       | -2.7532               | 1.8378       |
| Co2 vertical       | -3.2925               | 3.3210       |
| Parallel surface 1 | -4.8428               | 1.8176       |
| Parallel surface 2 | -3.4120               | 1.7874       |

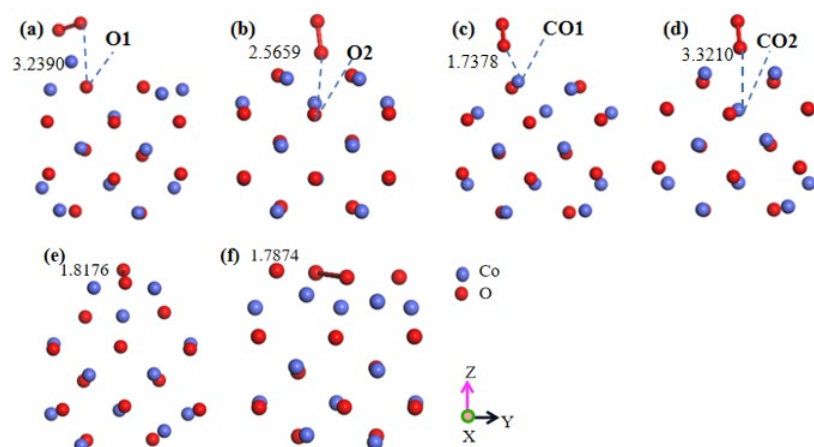

**Figure S3**  $O_2$  is adsorbed on  $CoO(110)$  surface. **(a-d)** Vertical the surface; **(e, f)** Parallel surface 1 and Parallel surface 2.

Figure S3 reflects vertical and parallel modalities when  $O_2$  molecule is adsorbed on  $CoO(110)$  surface (including four vertical formation O1, O2, Co1, Co2 sites and two parallel formation Parallel surface 1, Parallel surface 2 respectively). The  $E_{ads}$  are negative when  $O_2$  is adsorbed on different sites of  $CoO(110)$  surface as shown in Table S5. It reveals the adsorption of  $O_2$  molecule on  $Co(110)$  surface is exothermic. The adsorbed distance is more than 3 Å when  $O_2$  is adsorbed O1 site and Co2 site of  $CoO(110)$  surface, except  $O_2$  on O2 and Co1 sites. It indicates the formation of bonding between  $O_2$  and different adsorbed sites on O1 sites and Co2 sites. According to the  $E_{ads}$  (adsorption energy) and adsorbed distance, Parallel surface 1 is the best adsorption form of  $O_2$  molecule on  $CoO(110)$  surface.

**Table S6** The adsorption of  $O_2$  on  $SnO_2(100)$  surface

| Sites              | $E_{ads}$ (eV) | Distance (Å) |
|--------------------|----------------|--------------|
| O1 vertical        | -4.2644        | 2.6984       |
| O2 vertical        | -4.9666        | 3.1392       |
| Sn vertical        | -3.9666        | 2.1937       |
| Parallel surface 1 | -4.5361        | 2.1986       |
| Parallel surface 2 | -4.4308        | 2.2982       |



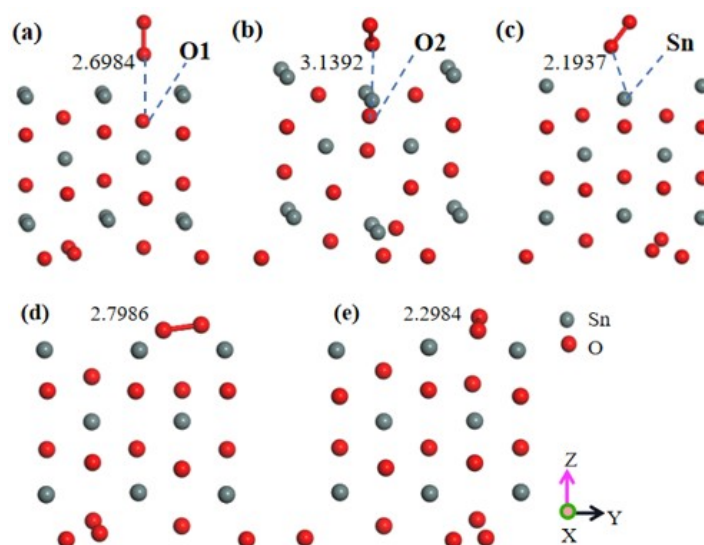

**Figure S4** O<sub>2</sub> is adsorbed on SnO<sub>2</sub>(100) surface. **(a-c)** Vertical the surface; **(d, e)** Parallel surface 1 and Parallel surface 2.

Figure S4 shows five patterns when O<sub>2</sub> molecule is adsorbed on different sites of SnO<sub>2</sub>(100) surface (including three vertical formations O1, O2, Sn sites and two parallel formations Parallel 1, Parallel 2). The  $E_{\text{ads}}$  is negative when O<sub>2</sub> is adsorbed on different sites of SnO<sub>2</sub>(100) surface as shown in Table S6. It indicates that the adsorption of O<sub>2</sub> molecule on SnO<sub>2</sub> surface is exothermic. The adsorbed distance is less than 3 Å which indicates the formation of bonding between O<sub>2</sub> molecule and different adsorbed sites, except on O2 site. According to the  $E_{\text{ads}}$  and adsorbed distance, in the case of Parallel surface 1, the O<sub>2</sub> adsorption is not only stable, but also has the best bonding effect with the adsorption site.

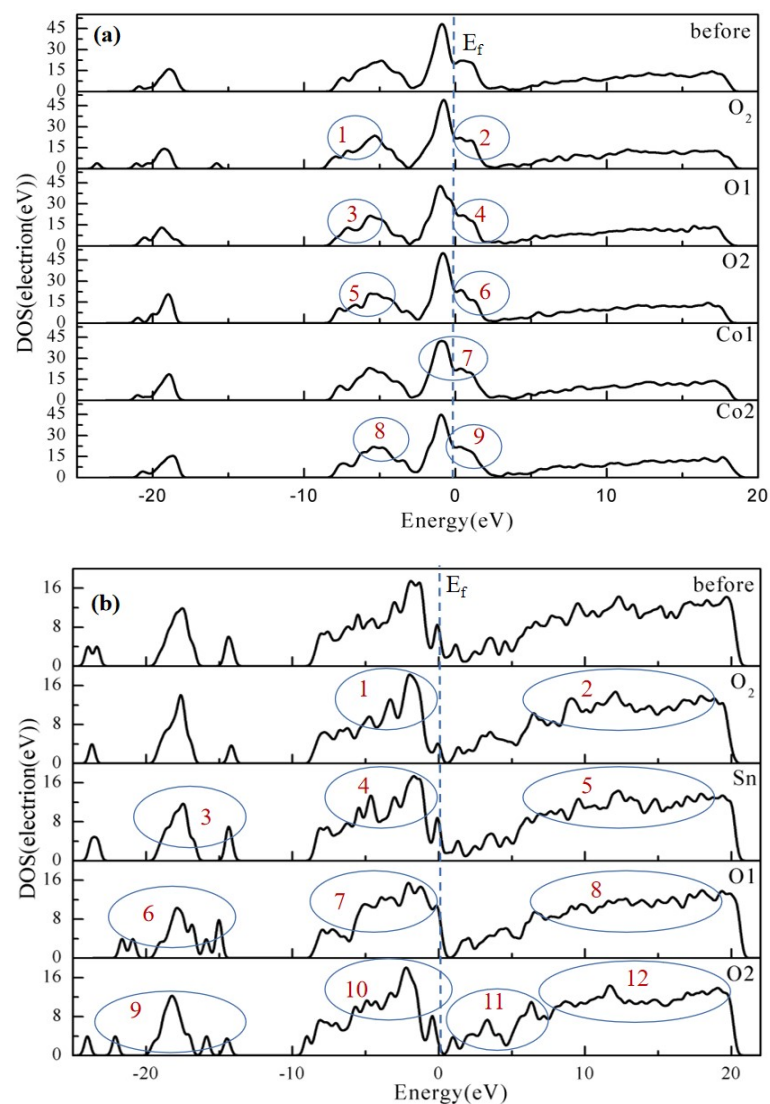

**Figure S5.** The DOS of H<sub>2</sub> adsorption on different sites of CoO(110)(II) and SnO<sub>2</sub>(100)(II) surface. **(a)** H<sub>2</sub> on O<sub>2</sub> molecule, and O1 site, O2 site, Co1 site, Co2 site of CoO(110)(II) surface. **(b)** H<sub>2</sub> on O<sub>2</sub> molecule, and O1 site, O2 site, Sn site of SnO<sub>2</sub>(100)(II) surface.

Figure S5(a) shows the DOS that H<sub>2</sub> is adsorbed on CoO(110)(II) surface. The DOS value is reduced when H<sub>2</sub> is adsorbed on O site of O<sub>2</sub> molecule as labeled 1 and 2. It implies the electronic resistance of CoO is enlarged. When H<sub>2</sub> is adsorbed on O1 site, DOS has obvious changes at Fermi level. The peaks near Fermi level are obviously disappear and the DOS value are decreased as labeled 3 and 4, indicated the CoO electronic resistance is increased. When H<sub>2</sub> is adsorbed on O2 site, the DOS

value has obvious reduce as labeled 5 and 6. Consequently, the CoO(110) electronic resistance is enhanced when H<sub>2</sub> is adsorbed on O2 site. The DOS value is significantly lower at Fermi level as labeled 7 when H<sub>2</sub> is adsorbed on Co1 site. It reflects the increases of electronic resistance for the adsorption of H<sub>2</sub>. When H<sub>2</sub> is adsorbed on Co2 site, the changes of DOS occurs at the Fermi level as labeled 8 and 9. The DOS value at the Fermi level has the remarkable reduction, revealing the CoO electronic resistance is increased. On the whole, the CoO electrical resistance is increased when H<sub>2</sub> is adsorbed on different sites of the surface.

Figure S5(b) shows the DOS of H<sub>2</sub> adsorption on SnO<sub>2</sub>(100)(II) surface. The DOS has evident changes when H<sub>2</sub> is adsorbed on O site of O<sub>2</sub> molecule. It indicates the SnO<sub>2</sub> electrical resistance has obvious changes. There are the formation of new peaks and increases of the DOS value (as labeled 1 and 2) when H<sub>2</sub> is adsorbed on Sn site. It implies the decrease of SnO<sub>2</sub> electronic resistance. DOS value has slight increases at Fermi level and amount of peaks are appear (as labeled 3, 4 and 5) when H<sub>2</sub> is adsorbed on Sn site. It reveals the enlargement of electrical conductivity. The DOS value has apparent raise (as labeled 6, 7 and 8) when H<sub>2</sub> is adsorbed on O1 site. It proves the decrease of SnO<sub>2</sub>(100) electronic resistance. There are the formation of new peaks and the DOS value also has distinct enlargement, when H<sub>2</sub> is adsorbed O2 site. Therefore, SnO<sub>2</sub>(100) electrical conductivity is enhanced when H<sub>2</sub> is adsorbed on O2 site. According to the above analysis, the SnO<sub>2</sub> resistance is reduced with H<sub>2</sub> adsorption on different sites of the surface.
